# Supplementary material
Source: PubMed Central journal article supplement (PMC10592179)
Supplement: NIHMS1923660-supplement-Supplemental_Publication_Material.pdf [file NIHMS1923660-supplement-Supplemental_Publication_Material.pdf]

## SUPPLEMENTAL MATERIAL

### Abnormal lymphatic S1P signaling aggravates lymphatic dysfunction and tissue inflammation

Dongeon Kim, PhD <sup>1,2,#</sup>, Wen Tian, PhD <sup>1,2,#</sup>, Timothy Ting-Hsuan Wu, MS <sup>2,3</sup>, Menglan Xiang, PhD <sup>1,2</sup>, Ryan Vinh, BS <sup>1,2</sup>, Jason Lon Chang, BS <sup>1,2</sup>, Shenbiao Gu, BS <sup>1,2</sup>, Seunghee Lee, PhD <sup>1,2</sup>, Yu Zhu, PhD <sup>1,2</sup>, Torrey Guan, BS <sup>1,2</sup>, Emilie Claire Schneider, MS <sup>1,2</sup>, Evan Bao, MS <sup>1,2</sup>, J. Brandon Dixon, PhD <sup>4</sup>, Peter Kao, MD <sup>2</sup>, Junliang Pan, PhD <sup>1,2</sup>, Stanley G. Rockson, MD <sup>2</sup>, Xinguo Jiang, MD, PhD <sup>1,2,\*</sup>, and Mark Robert Nicolls, MD <sup>1,2,\*</sup>.

<sup>1</sup>VA Palo Alto Health Care System, Palo Alto, California, USA.

<sup>2</sup>Stanford University School of Medicine, Stanford, California, USA.

<sup>3</sup>Department of Biochemistry, Stanford Bio-X, Stanford, California, USA.

<sup>4</sup>Georgia Institute of Technology, Atlanta, Georgia, USA

# These authors contributed equally to this work

\*To whom correspondence may be addressed. E-mail: mnicolls@stanford.edu; xinguoj@stanford.edu

**Table S1. Demographics of controls and lymphedema patients used for S1P analysis**

| Patient ID | Age | Sex | BMI   | ISL Class (1-3) | Primary / Secondary | Duration of Disease (year) | S1P LC-MS/MS (pg/ml) |
|------------|-----|-----|-------|-----------------|---------------------|----------------------------|----------------------|
| C1         | 33  | M   | n/a   | n/a             | n/a                 | n/a                        | 686.0                |
| C2         | 35  | M   | n/a   | n/a             | n/a                 | n/a                        | 511.0                |
| C3         | 30  | F   | n/a   | n/a             | n/a                 | n/a                        | 475.0                |
| C4         | 21  | M   | n/a   | n/a             | n/a                 | n/a                        | 444.0                |
| C5         | 31  | M   | n/a   | n/a             | n/a                 | n/a                        | 412.0                |
| C6         | 32  | M   | n/a   | n/a             | n/a                 | n/a                        | 404.0                |
| C7         | 27  | F   | n/a   | n/a             | n/a                 | n/a                        | 363.0                |
| C8         | 60  | M   | n/a   | n/a             | n/a                 | n/a                        | 360.0                |
| C9         | 61  | M   | n/a   | n/a             | n/a                 | n/a                        | 351.0                |
| C10        | 84  | M   | n/a   | n/a             | n/a                 | n/a                        | 254.0                |
| P1         | 68  | F   | 26.19 | 2               | Secondary           | 4                          | 200.0                |
| P2         | 85  | F   | 26.18 | 2               | Secondary           | 4                          | 193.0                |
| P3         | 44  | F   | 24.58 | 2               | Secondary           | 38                         | 185.0                |
| P4         | 27  | M   | 22.97 | 2               | Primary             | 8                          | 182.0                |
| P5         | 62  | F   | 33.08 | 2               | Secondary           | 5                          | 172.0                |
| P6         | 59  | F   | 29.27 | 2               | Secondary           | 22                         | 142.0                |
| P7         | 77  | F   | 37.68 | 2               | Secondary           | 5                          | 100.0                |
| P8         | 76  | F   | 48.53 | 3               | Primary             | childhood                  | 85.0                 |
| P9         | 69  | M   | 51.35 | 2               | Secondary           | 13                         | 72.0                 |
| P10        | 71  | F   | 23.67 | 2               | Secondary           | 4                          | 46.0                 |

C1-C10 represents healthy control.  
P1-P10 belongs to the lymphedema cohort.  
n/a, not applicable

BMI= Body mass index  
ISL= International Society of Lymphology

**Table S2. Clinical Characteristics and S1P serum levels for lymphedema subjects and healthy control**

|                            | Health control | Lymphedema cohort | P value |
|----------------------------|----------------|-------------------|---------|
| Age (years)                | 41 ± 20        | 64 ± 17           | P<0.02  |
| Female sex - no. (%)       | 2 (80)         | 8 (80)            | P=0.008 |
| BMI                        | N/A            | 32 ± 10           |         |
| Lymphedema ISL Class 2 (%) | N/A            | 90                |         |
| Lymphedema ISL Class 3 (%) | N/A            | 10                |         |
| Primary Lymphedema (%)     | N/A            | 20                |         |
| Secondary Lymphedema (%)   | N/A            | 80                |         |
| Disease duration (years)   | N/A            | 18 ± 23           |         |

The dichotomous variables were statistically analyzed with Chi Square test, the continuous variables with unpaired t test, and numerical data are presented with mean plus/minus standard deviation.

**Table S3. The sequences of the mouse-specific primers used for RT-qPCR**

| Gene (mouse) | Sense (5'→3')          | Antisense (5'→3')      |
|--------------|------------------------|------------------------|
| <i>Sphk1</i> | CGGTGATGGTCTGATGCATG   | GAGGCTACACAGGGGTTTCT   |
| <i>S1pr1</i> | GCCACCACTTACAAGCTCAC   | CAAACATACTCCCTTCCCGCA  |
| <i>18s</i>   | GGACCAGAGCGAAAGCATTGCC | TCAATCTCGGGTGGCTGAACGC |

**Table S4. The sequences of the human-specific primers used for RT-qPCR**

| Gene (human) | Sense (5'→3')        | Antisense (5'→3')     |
|--------------|----------------------|-----------------------|
| <i>S1PR1</i> | TGCTGGCAAATTCAAGC    | GGGTTGTCCCCTTCGTC     |
| <i>S1PR2</i> | AAGCTGTATGGCAGCGA    | AGAAGATGGTCACCACGCAC  |
| <i>S1PR3</i> | TGGTCCCCACTCTTCATCCT | CAGCCAACACGATGAACCAC  |
| <i>S1PR4</i> | CGTCTTTGGCTCCAACCTCT | TGCTGCGGAAGGAGTAGATG  |
| <i>S1PR5</i> | CGCCTTCATCGTGCTAGAGA | CAGGAGCAGGAACATGGGA   |
| <i>SPHK1</i> | GAGAAGTATCGGCGTCTGGG | CTACAGGGAGGTAGGCCAGT  |
| <i>SPHK2</i> | CTGACTGGGAGGAAGCTGTG | AGTTGAGCAACAGGTGCGAGG |
| <i>18S</i>   | CTGCCATTAAGGGTGTGTC  | CAGCCCTCTGGTGGGTCAAT  |

**Table S5. Key resources**

| REAGENT or RESOURCE                      | SOURCE        | IDENTIFIER |
|------------------------------------------|---------------|------------|
| Antibodies                               |               |            |
| Anti-mouse-CD4 (GK 1.5), BV421           | BD Bioscience | 562891     |
| Anti-mouse-CD8 (53-6.7), APC-Cy7         | BD Bioscience | 557654     |
| Anti-mouse-CD25 (PC61), PE               | BD Bioscience | 553866     |
| Anti-mouse-CD25 (PC61), BB700            | BD Bioscience | 566498     |
| Anti-mouse-CD31 (MEC 13.3), BV421        | BD Bioscience | 562939     |
| Anti-mouse-CD44 (IM7), PE-Cy7            | BD Bioscience | 560569     |
| Anti-mouse-CD45 (30-F11), BB515          | BD Bioscience | 564590     |
| Anti-mouse-CD69 (H1.2F3), BV650          | BD Bioscience | 740460     |
| Anti-mouse-CD103 (2E7), BB700            | BD Bioscience | 748240     |
| Anti-mouse-IFN-γ (XMG1.2), FITC          | BD Bioscience | 554411,    |
| Anti-mouse-IL-4 (11B11), PE              | BD Bioscience | 554435,    |
| Anti-mouse-IL-17A (TC11-18H10), AF647    | BD Bioscience | 560184     |
| Anti-mouse-Foxp3 (R16-715), AF647        | BD Bioscience | 563486     |
| Anti-mouse-S1PR1 (713412), APC           | R&D systems   | FAB7089A   |
| IgG2A isotype (54447), APC               | R&D systems   | IC006A     |
| Anti-mouse-podoplanin (gp38) (8.1.1), PE | BD Bioscience | 566390     |
| IgG2a,k isotype (G155-178), PE-CF594     | BD Bioscience | 562306     |
| Anti-human-CD4 (OKT4), BV421             | BD Bioscience | 566703     |
| Anti-human-CD8 (RPA-T8), BV480           | BD Bioscience | 566121     |
| Anti-human-CD44 (G44-27), PE-Cy7         | BD Bioscience | 560533     |
| Anti-human/mouse CLA (HECA-452), AF647   | Biolegend     | 321310     |
| Anti-human-IFN-γ (B27), FITC             | BD Bioscience | 554700     |
| Anti-human-IL-4 (MP4-25D2), PE           | BD Bioscience | 554485     |

|                                                                         |                       |              |
|-------------------------------------------------------------------------|-----------------------|--------------|
| Anti-human-IL-17A (560490), AF647                                       | BD Bioscience         | 560490       |
| Monoclonal Rat anti-mouse LYVE1 (ALY7)                                  | LSBio                 | LS-C106690   |
| Monoclonal Mouse Anti-Human podoplanin (D2-40)                          | Dako                  | M3619        |
| S1P1 Polyclonal Antibody                                                | Invitrogen            | PA1-1040     |
| Recombinant Anti-CD4 antibody (EPR19514)                                | Abcam                 | Ab183685     |
| <b>Chemicals, Peptides, and Recombinant Proteins</b>                    |                       |              |
| eBioscience Fixable Viability Dye eFluor 506                            | ThermoFisher          | 65-0866      |
| eBioscience Fixable Viability Dye eFluor 780                            | ThermoFisher          | 65-0865      |
| NA/LE anti-mouse CD3 (145-2C11)                                         | BD Bioscience         | 553057       |
| NA/LE anti-mouse CD28 (37.51)                                           | BD Bioscience         | 553294       |
| Purified Rat Anti-mouse CD16/CD32 (2.4G2)                               | BD Bioscience         | 553142       |
| ImmunoCult™ Human CD3/CD28 T cell Activator                             | STEMCELL              | 10991        |
| Cell Stimulation Cocktail<br>(plus protein transport inhibitors) (500x) | Invitrogen            | 00-4975      |
| Bovine Plasma Fibronectin (BPF)                                         | ScienCell             | 8248         |
| AbC Total Antibody Compensation Bead Kit                                | Invitrogen            | A10497       |
| Endothelial Cell Growth Medium 2 Kit                                    | PromoCell             | C-22111      |
| Advanced RPMI 1640 Medium                                               | Bibco                 | 12633012     |
| Penicillin-Streptomycin-Glutamine (100X)                                | Gibco                 | 10378016     |
| Trypsin-EDTA (0.25%), phenol red                                        | Gibco                 | 25200056     |
| Ad-GFP-U6-h-S1PR1-shRNA                                                 | VECTOR BIOLABS        | shADV-230289 |
| 4-deoxy Pyridoxine (4-DP)                                               | Cayman                | 21863        |
| Anti-mouse P-selectin Ab (RB40.34.4)                                    | Make it in-house      |              |
| Anti-human P-selectin Ab (Waps 12.2)                                    | Make it in-house      |              |
| Histopaque-1077 hybr-Max                                                | Sigma                 | H8889        |
| Normal Donkey Serum                                                     | Jackson Immu.Resear.  | 017-000-121  |
| Antifade Mounting medium with DAPI                                      | VECTOR                | H-1200       |
| Donkey anti-rat-Cy3                                                     | Jackson Immu.Resear.  | 712-166-150  |
| Donkey anti-rat-AF488                                                   | Jackson Immu.Resear.  | 712-546-153  |
| Donkey anti-rabbit-Cy3                                                  | Jackson Immu.Resear.  | 711-165-152  |
| Indocyanine green (ICG)                                                 | MedChemExpress        | HY-D0711     |
| Tamoxifen                                                               | Sigma                 | T5648        |
| Human Derma Lymphatic Endothelial Cells                                 | PromoCell             | C-12217      |
| Buffy coat from whole blood                                             | Stanford Blood Center | A1005        |
| <b>Critical Commercial Assays</b>                                       |                       |              |
| Naïve CD4 <sup>+</sup> T cell Isolation Kit (mouse)                     | Miltenyi Biotec       | 130-104-453  |
| Foxp3/Transcription Factor Staining Buffer Set                          | ThermoFisher          | 00-5523-00   |
| Intracellular Fixation/Permeabilization Buffer Set                      | ThermoFisher          | 88-8824-00   |
| Multi Tissue Dissociation Kit I                                         | Miltenyi Biotec       | 130-110-201  |
| EasySep Human Naïve CD4 <sup>+</sup> T cell Isolation Kit I             | STEMCELL              | 19555        |
| EasySep Human Naïve CD4 <sup>+</sup> T cell Isolation Kit II            | STEMCELL              | 17555        |
| EasySep Human Memory CD4 <sup>+</sup> T cell Isolation Kit              | STEMCELL              | 19157        |
| RNeasy® Plus Mini Kit                                                   | QIAGEN                | 74136        |
| RNeasy® Mini Kit                                                        | QIAGEN                | 74106        |
| RNeasy® Fibrous Tissue Mini Kit                                         | QIAGEN                | 74704        |

| Experimental Models: Organisms/Strains                                     |                    |            |
|----------------------------------------------------------------------------|--------------------|------------|
| C57BL/6J                                                                   | Jackson Laboratory | JAX:000664 |
| Prox1 <sup>tm3(cre/ERT2)</sup> Gco/J                                       | Jackson Laboratory | JAX:022075 |
| B6.129S6(FVB)-S1pr1 <sup>tm2.1Rlp/J</sup>                                  | Jackson Laboratory | JAX:019141 |
| B6.Cg Gt(ROSA)26Sortm14(CAG-tdTomato)Hze/J                                 | Jackson Laboratory | JAX:007914 |
| Prox1-Cre <sup>ERT2</sup> S1pr1 <sup>fl/fl</sup> (S1pr1 <sup>LECKO</sup> ) | This paper         | N/A        |
| Prox1-Cre <sup>ERT2</sup> -tdTomato                                        | This paper         | N/A        |
| Software and Algorithms                                                    |                    |            |
| FACSAria III Sorter                                                        | BD Biosciences     |            |
| DMi8                                                                       | LEICA              |            |
| LSR Fortessa                                                               | BD Biosciences     |            |
| LSM710                                                                     | Zeiss              |            |
| D-520 Zoom digital camera                                                  | Olympus            |            |
| MVX10                                                                      | Olympus            |            |
| AMI Prism® 7900HT Sequence Detection System                                | Appliedbiosystems  |            |
| MACS Octo Dissociator with Heaters                                         | Miltenyi Biotec    |            |
| FlowJo (version 10)                                                        | BD Biosciences     |            |
| ImageJ                                                                     |                    |            |
| Imaris                                                                     | Oxford Instruments |            |
| GraphPad Prism (version 9)                                                 | GraphPad           |            |
| JMP Pro 17                                                                 | JMP                |            |

**Table S6. The list of differentially up-regulated gene in shS1PR1-HDLECs**

| Without CD4 T cell co-culture | Intersection    | With CD4 T cell co-culture |          |        |            |
|-------------------------------|-----------------|----------------------------|----------|--------|------------|
| STAB2                         | <b>SELP</b>     | OMG                        | CPM      | WDFY4  | SLC12A5    |
| AGTR1                         | <b>RGS5</b>     | GPNMB                      | PCDH17   | LIMCH1 | COL12A1    |
| TCF15                         | <b>DIRAS3</b>   | BRME1                      | MMP9     | CD36   | KCNN4      |
| MAILR                         | <b>ADAMTS18</b> | TOX                        | H2BC4    | LFNG   | ZC3H12A-DT |
| FLRT3                         | <b>ADRA1D</b>   | KIF19                      | ADAMTS14 | OLFM1  | ADGRG4     |
| RNF185-AS1                    | <b>APLN</b>     | TIPARP-AS1                 | DRAXIN   | DCLK1  | TMEM163    |
| PITX1-AS1                     | <b>IL33</b>     | CEROX1                     | MYRIP    | CETP   | RPLP0P6    |
| C3AR1                         |                 | SPEG                       | CDH11    | SIRT4  | CORO2B     |
| CFI                           |                 | RPAP3-DT                   | CEND1    | RASSF5 | LINC02015  |
| SPTBN5                        |                 | TSPAN11                    | MIR210HG | SELE   | CHST6      |
| TGFA                          |                 | SRGAP3                     | AR       | H2AC6  | HOXD3      |
|                               |                 | GOLGA8R                    | TRIM73   | AQP11  | ZNF667-AS1 |
|                               |                 | LINC01303                  | NEK10    | COL9A3 | INKA1      |
|                               |                 | LINC02159                  | TMEM265  | LYPD1  | LINC02154  |
|                               |                 | DUT-AS1                    | DPEP1    | NPFFR2 | MAP1A      |
|                               |                 | MAN1C1                     | PKIB     | CTXN1  | COL15A1    |
|                               |                 | ODAD3                      | NPTX2    | PTGS1  | PRND       |
|                               |                 | CPE                        | KCNE3    | MAFB   | SLCO2B1    |
|                               |                 | KIF1A                      | RN7SL3   | ASS1   | SORL1      |
|                               |                 | PTGIS                      | SLC22A17 | CKB    | PIK3R3     |

|  |  |           |          |        |          |
|--|--|-----------|----------|--------|----------|
|  |  | GRM1      | BMPER    | SLC9A7 | NPTXR    |
|  |  | MIR503HG  | H2BC5    | FOXD1  | MARVELD3 |
|  |  | AIF1L     | IL2RB    | H2BC12 | ZAP70    |
|  |  | PCDHB6    | AFTPH-DT | ASRGL1 | MYG1-AS1 |
|  |  | SOGA3     | HSD17B14 | CXADR  | CPA4     |
|  |  | PCMTD1-DT | RNASE1   | SELL   | SNCB     |

**Table S7. Fold change of differentially up-regulated gene in shS1PR1-HDLECs.**

| Without CD4 T cell co-culture |             | With CD4 T cell co-culture |             |                 |             |             |             |
|-------------------------------|-------------|----------------------------|-------------|-----------------|-------------|-------------|-------------|
| Gene symbol                   | Fold change | Gene symbol                | Fold change | Gene symbol     | Fold change | Gene symbol | Fold change |
| STAB2                         | 15.91       | OMG                        | 16.11       | ADAMTS14        | 3.73        | LINC02015   | 2.64        |
| AGTR1                         | 10.02       | GPNMB                      | 13.86       | DRAXIN          | 3.70        | SIRT4       | 2.59        |
| <b>SELP</b>                   | <b>9.97</b> | BRME1                      | 13.13       | MYRIP           | 3.61        | RASSF5      | 2.56        |
| TCF15                         | 9.44        | TOX                        | 12.46       | CDH11           | 3.60        | SELE        | 2.55        |
| <b>ADAMTS18</b>               | <b>6.22</b> | KIF19                      | 10.25       | CEND1           | 3.60        | H2AC6       | 2.53        |
| MAILR                         | 6.21        | TIPARP-AS1                 | 9.66        | <b>DIRAS3</b>   | <b>3.57</b> | AQP11       | 2.53        |
| FLRT3                         | 5.86        | <b>SELP</b>                | <b>9.36</b> | MIR210HG        | 3.52        | COL9A3      | 2.52        |
| RNF185-AS1                    | 4.40        | CEROX1                     | 9.09        | AR              | 3.45        | LYPD1       | 2.51        |
| PITX1-AS1                     | 3.38        | SPEG                       | 8.99        | TRIM73          | 3.43        | <b>IL33</b> | <b>2.50</b> |
| <b>DIRAS3</b>                 | <b>2.56</b> | RPAP3-DT                   | 8.66        | NEK10           | 3.33        | NPFFR2      | 2.49        |
| C3AR1                         | 2.50        | TSPAN11                    | 8.14        | TMEM265         | 3.33        | CTXN1       | 2.49        |
| <b>IL33</b>                   | <b>2.50</b> | SRGAP3                     | 7.13        | DPEP1           | 3.26        | PTGS1       | 2.44        |
| <b>APLN</b>                   | <b>2.45</b> | GOLGA8R                    | 7.12        | PKIB            | 3.26        | MAFB        | 2.42        |
| <b>ADRA1D</b>                 | <b>2.21</b> | LINC01303                  | 6.65        | NPTX2           | 3.17        | ASS1        | 2.42        |
| <b>RGS5</b>                   | <b>2.10</b> | LINC02159                  | 6.52        | KCNE3           | 3.17        | CKB         | 2.41        |
| CFI                           | 2.08        | DUT-AS1                    | 6.30        | RN7SL3          | 3.16        | SLC9A7      | 2.40        |
| SPTBN5                        | 2.07        | MAN1C1                     | 6.10        | SLC22A17        | 3.15        | FOXD1       | 2.38        |
| TGFA                          | 2.01        | ODAD3                      | 6.07        | BMPER           | 3.15        | H2BC12      | 2.32        |
|                               |             | CPE                        | 5.98        | H2BC5           | 3.07        | ASRGL1      | 2.30        |
|                               |             | KIF1A                      | 5.85        | <b>ADAMTS18</b> | <b>3.04</b> | CXADR       | 2.29        |
|                               |             | PTGIS                      | 5.56        | IL2RB           | 3.02        | SELL        | 2.26        |
|                               |             | GRM1                       | 5.52        | AFTPH-DT        | 3.02        | ZNF667-AS1  | 2.23        |
|                               |             | MIR503HG                   | 5.46        | <b>ADRA1D</b>   | <b>2.96</b> | INKA1       | 2.22        |
|                               |             | AIF1L                      | 5.31        | HSD17B14        | 2.94        | LINC02154   | 2.22        |
|                               |             | PCDHB6                     | 5.23        | RNASE1          | 2.89        | MAP1A       | 2.18        |
|                               |             | SOGA3                      | 4.88        | PRND            | 2.82        | SLC12A5     | 2.14        |
|                               |             | MMP9                       | 4.78        | SLCO2B1         | 2.82        | COL12A1     | 2.13        |
|                               |             | MARVELD3                   | 4.70        | SORL1           | 2.81        | KCNN4       | 2.13        |
|                               |             | ZAP70                      | 4.62        | PIK3R3          | 2.78        | ZC3H12A-DT  | 2.11        |
|                               |             | CPA4                       | 4.60        | NPTXR           | 2.76        | ADGRG4      | 2.10        |
|                               |             | SNCB                       | 4.45        | WDFY4           | 2.75        | TMEM163     | 2.06        |
|                               |             | CPM                        | 4.28        | LIMCH1          | 2.75        | MYG1-AS1    | 2.06        |
|                               |             | SOGA3                      | 4.00        | <b>APLN</b>     | <b>2.71</b> | RPLP0P6     | 2.04        |
|                               |             | <b>RGS5</b>                | <b>3.93</b> | CD36            | 2.71        | CORO2B      | 2.04        |
|                               |             | PCDH17                     | 3.93        | COL15A1         | 2.71        | CETP        | 2.04        |
|                               |             | PCMTD1-DT                  | 3.93        | OLFM1           | 2.71        | CHST6       | 2.01        |
|                               |             | H2BC4                      | 3.79        | DCLK1           | 2.68        | HOXD3       | 2.00        |

**Table S8. Gene set enrichment analysis comparisons between sh*Ctr*-HDLECs and sh*S1PR1*-HDLECs with CD4 T cell co-culture.**

| <b>Gene Set Name</b>                                     | <b>Genes in Gene Set (K)</b> | <b>Genes in Overlap (k)</b> |
|----------------------------------------------------------|------------------------------|-----------------------------|
| CELL CELL SIGNALING                                      | 1679                         | 18                          |
| CELL ADHESION                                            | 1541                         | 16                          |
| CELLULAR_MONOVALENT INORGANIC ANION HOMEOSTASIS          | 11                           | 3                           |
| CELL MOTILITY                                            | 1794                         | 17                          |
| ANATOMICAL STRUCTURE FORMATION INVOLVED IN MORPHOGENESIS | 1244                         | 14                          |
| REGULATION OF CELLULAR LOCALIZATION                      | 954                          | 12                          |
| NEGATIVE REGULATION OF PROTEIN LOCALIZATION              | 203                          | 6                           |
| CELLULAR ANION HOMEOSTASIS                               | 20                           | 3                           |
| MONOVALENT INORGANIC ANION HOMEOSTASIS                   | 20                           | 3                           |
| SYNAPTIC SIGNALING                                       | 761                          | 10                          |
| CELLULAR HOMEOSTASIS                                     | 775                          | 10                          |
| CENTRAL NERVOUS SYSTEM PROJECTION NEURON AXONOGENESIS    | 28                           | 3                           |
| CELLULAR ION HOMEOSTASIS                                 | 517                          | 8                           |
| LYMPHOCYTE ACTIVATION                                    | 841                          | 10                          |
| PHOSPHORYLATION                                          | 1862                         | 15                          |
| CELL VOLUME HOMEOSTASIS                                  | 32                           | 3                           |
| LOCOMOTION                                               | 1446                         | 13                          |
| CELL JUNCTION ORGANIZATION                               | 707                          | 9                           |
| T CELL ACTIVATION                                        | 549                          | 8                           |
| CENTRAL NERVOUS SYSTEM NEURON DIFFERENTIATION            | 174                          | 5                           |

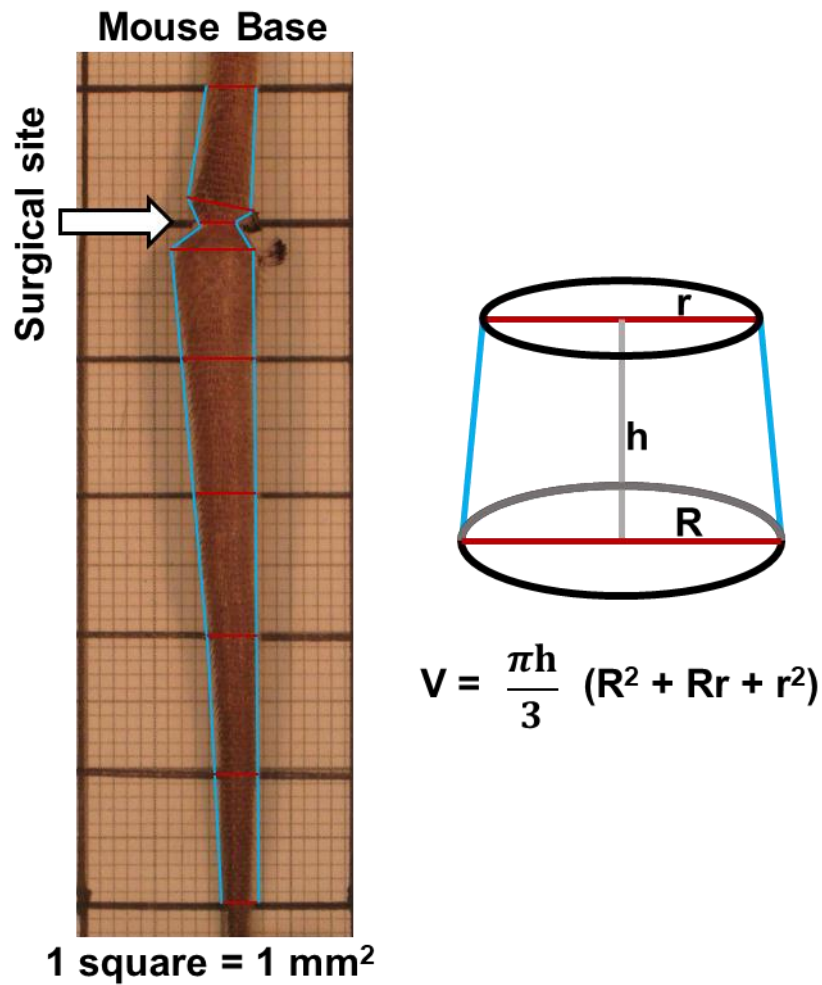

**Figure S1. Tail volume was calculated through a digital photographic technique.**

Mouse-tail volume was calculated through a digital photographic technique pre-operatively, and post-operatively on d7, d14, and d21 using an Olympus D520 Zoom digital camera at SHQ resolution at a fixed distance from the subject (37cm). All images were processed and analyzed in Adobe Photoshop CS6.



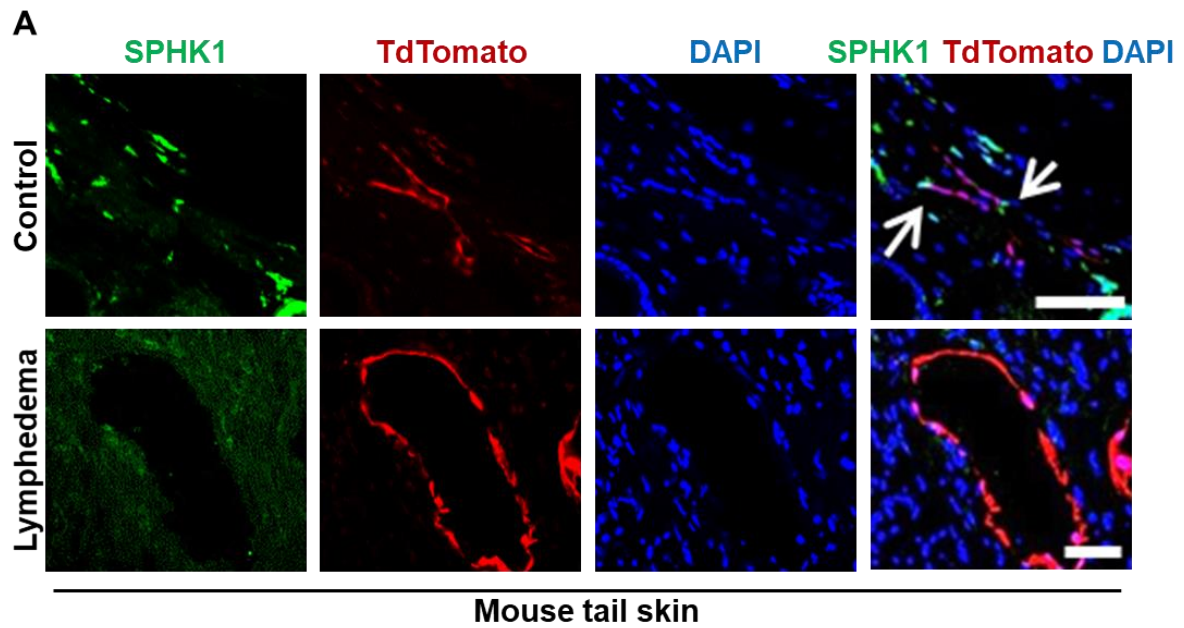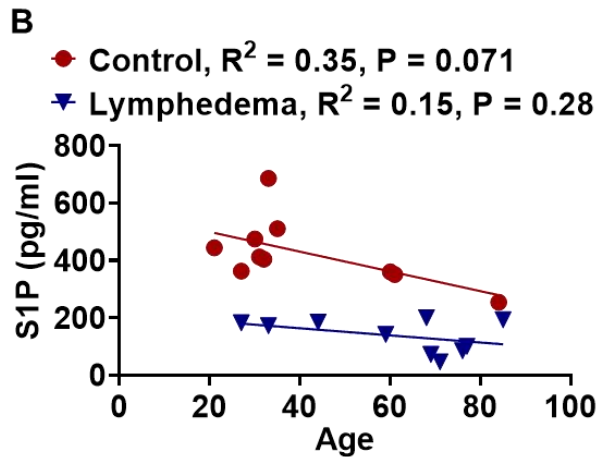

**Figure S2. Decreased S1P signaling with lymphedema in both human and mouse.**

**(A)** Representative immunofluorescent staining of SPHK1 (green) in *Prox1-Cre<sup>ERT2</sup>-tdTomato* mouse tail-skin. Tissues were harvested on d21 following sham surgery (control) or lymphedema surgery. DAPI (blue) stains nuclei; white arrows indicate co-staining; scale bar = 20 $\mu$ m. Note that different magnifications were used to better illustrate lymphatic structures in the control and lymphedema groups. **(B)** S1P concentrations were plotted against age of each individual.  $R^2$  and  $P$  values were calculated by Pearson correlation test ( $n = 10$  per each group).  $R^2$  were calculated by Pearson correlation test.

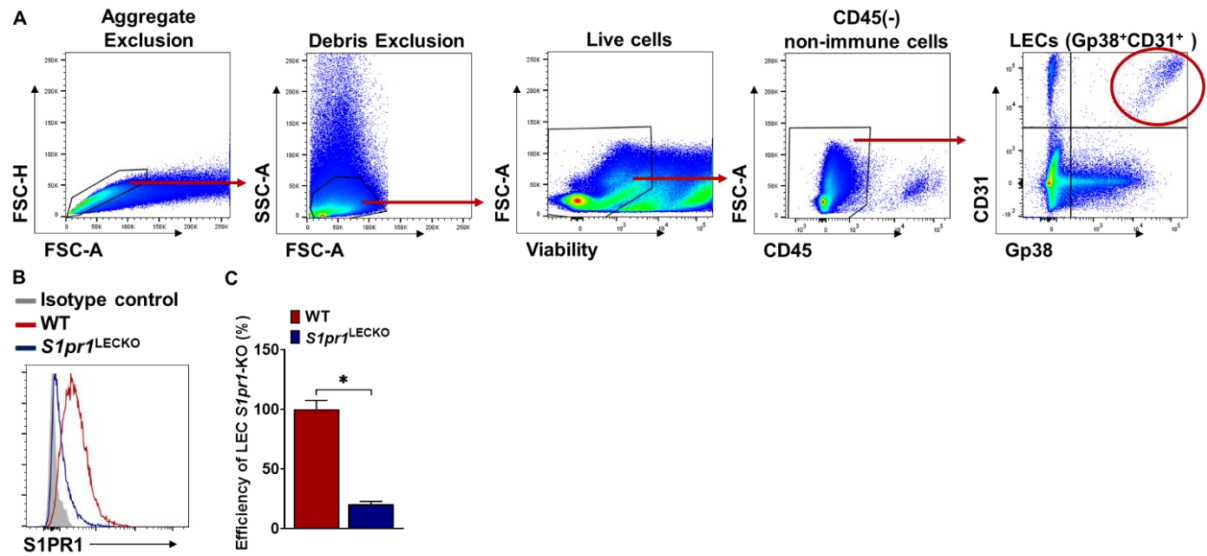

**Figure S3. *Prox1-cre*<sup>ERT2</sup> effectively mediates *S1pr1* deletion in LECs.**

(A) Flow cytometric analysis was performed 3 weeks after tamoxifen treatment. Flow cytometric gating scheme for the determination of LEC population. The singlet is single cell gating for doublet discrimination. (B and C) S1PR1 fluorescence intensity in LEC (Gp38<sup>+</sup>CD31<sup>+</sup>) in the tail skin from WT (red) and *S1pr1*<sup>LECKO</sup> (blue) mice was quantified by flow cytometric analysis. Representative (B) and compiling data (C) are shown (n = 4 per each group). Data are presented as mean ± SEM; \* p < 0.05 by the Mann-Whitney test.

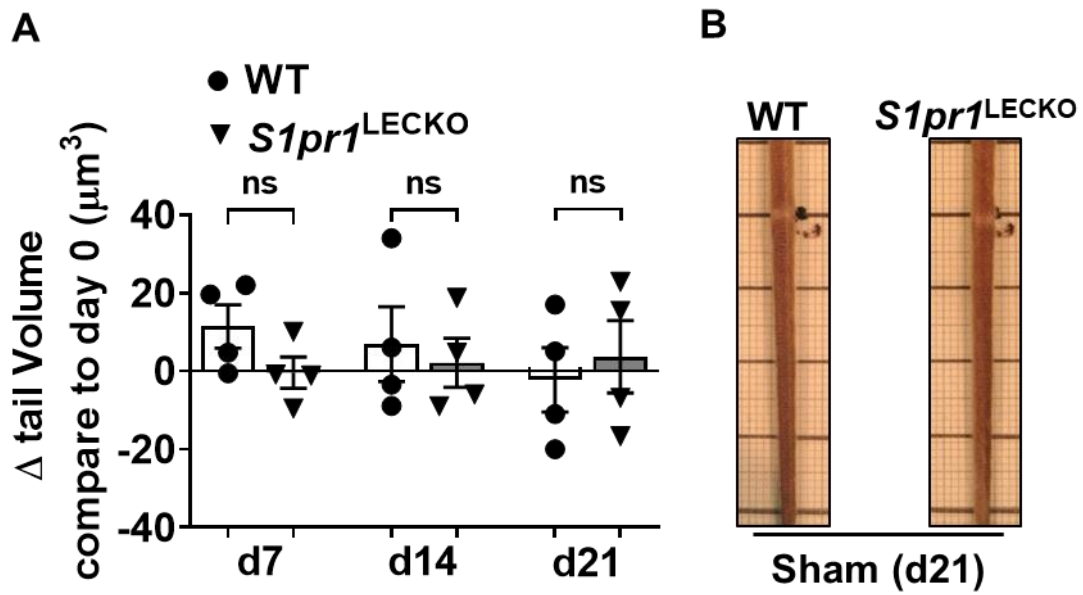

**Figure S4. *S1pr1*<sup>LECKO</sup> does not affect wound healing following sham surgery.** (A) Tail volume measurements of WT and *S1pr1*<sup>LECKO</sup> on 7d, 14d, and 21d following sham surgery (n = 4 per each group). (B) Representative tail image 21d following sham surgery. Data are presented as mean  $\pm$  SEM; ns (not significant) by the Mann-Whitney test.

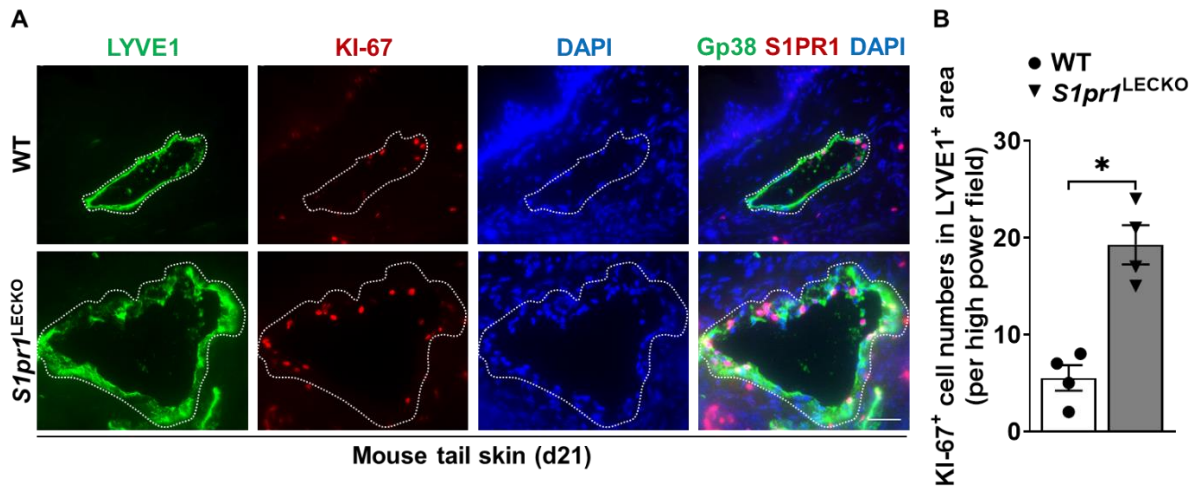

**Figure S5. Increased KI-67<sup>+</sup> cells of LYVE1 area in lymphatic specific *S1pr1*-deficient lymphedema mice.**

**(A and B)** Immunofluorescent images of LYVE1 (green) and KI-67 (red) of tail skin 21d after surgery. Representative image (A) and quantification KI-67<sup>+</sup> cells in the LYVE1 areas (B) are shown (n = 4 per each group). DAPI (blue) stains the nucleus. Scale bar = 50  $\mu$ m. Data are presented as mean  $\pm$  SEM; \* p < 0.05 by the Mann-Whitney test.

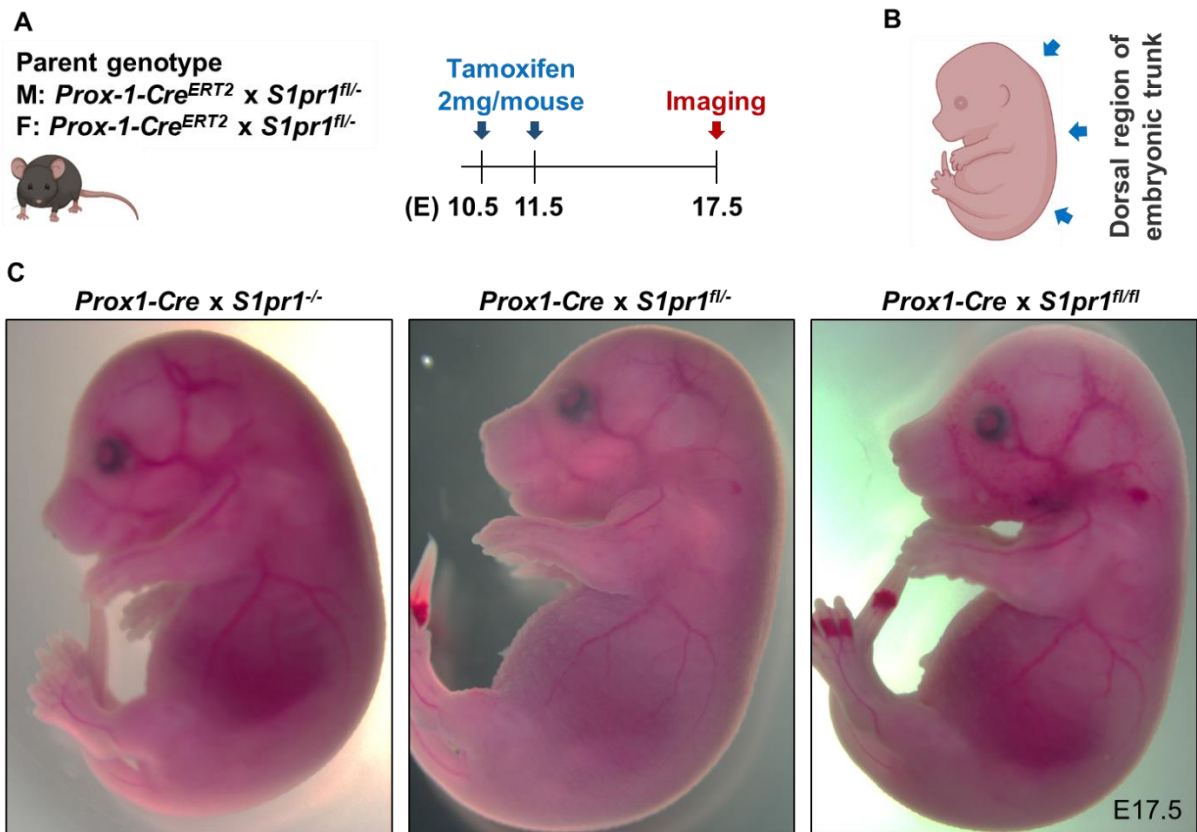

**Figure S6. No dorsal edema pattern in mouse embryos lacking lymphatic specific *S1pr1*.** (A) Strategy for injecting pregnant mice (*Prox-1-Cre<sup>ERT2</sup>* x *S1pr1<sup>fl/-</sup>* mated with *Prox-1-Cre<sup>ERT2</sup>* x *S1pr1<sup>fl/-</sup>*) with tamoxifen. (B) Arrow shows edema formation observed in the dermis of the back. (C) Freshly harvested embryos in E17.5 were imaged under a brightfield microscope.

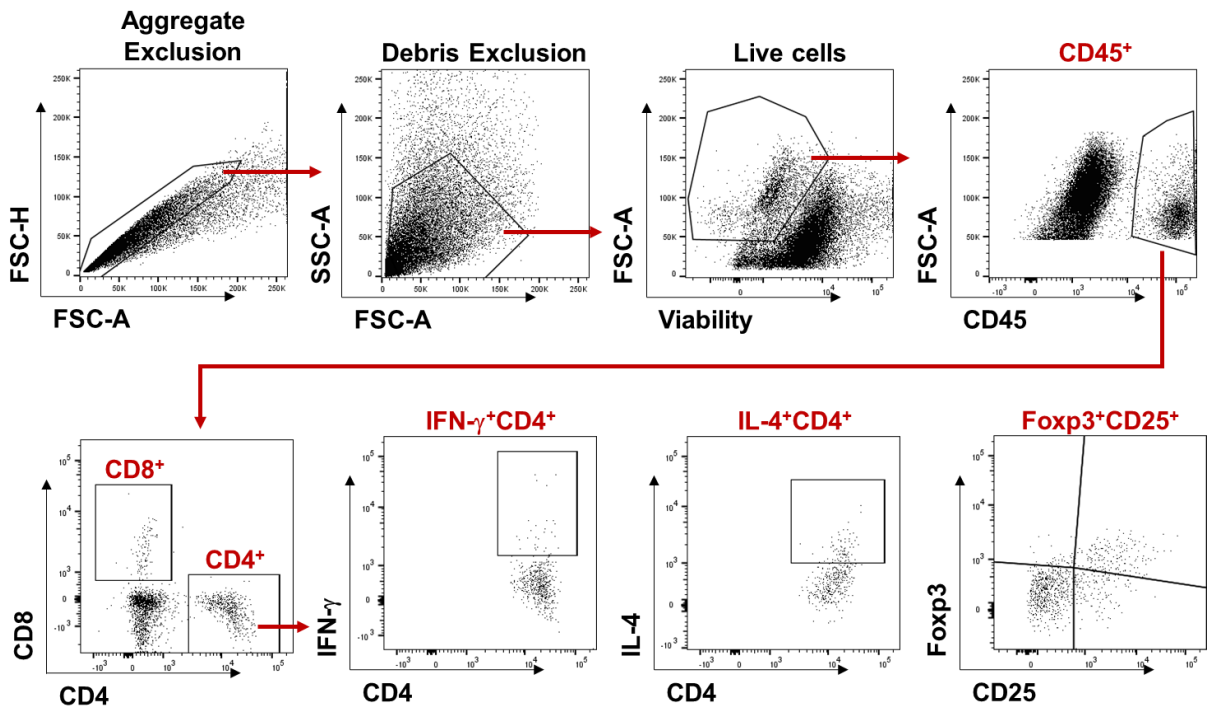

**Figure S7. Flow cytometry analysis strategy for T cell population profiling in tail skin.** Representative flow cytometric gating scheme for determining T cell populations in the tail skin. IFN- $\gamma$ <sup>+</sup>CD4<sup>+</sup> for Th1, IL-4<sup>+</sup>CD4<sup>+</sup> for Th2, and Foxp3<sup>+</sup>CD25<sup>+</sup> for Treg.

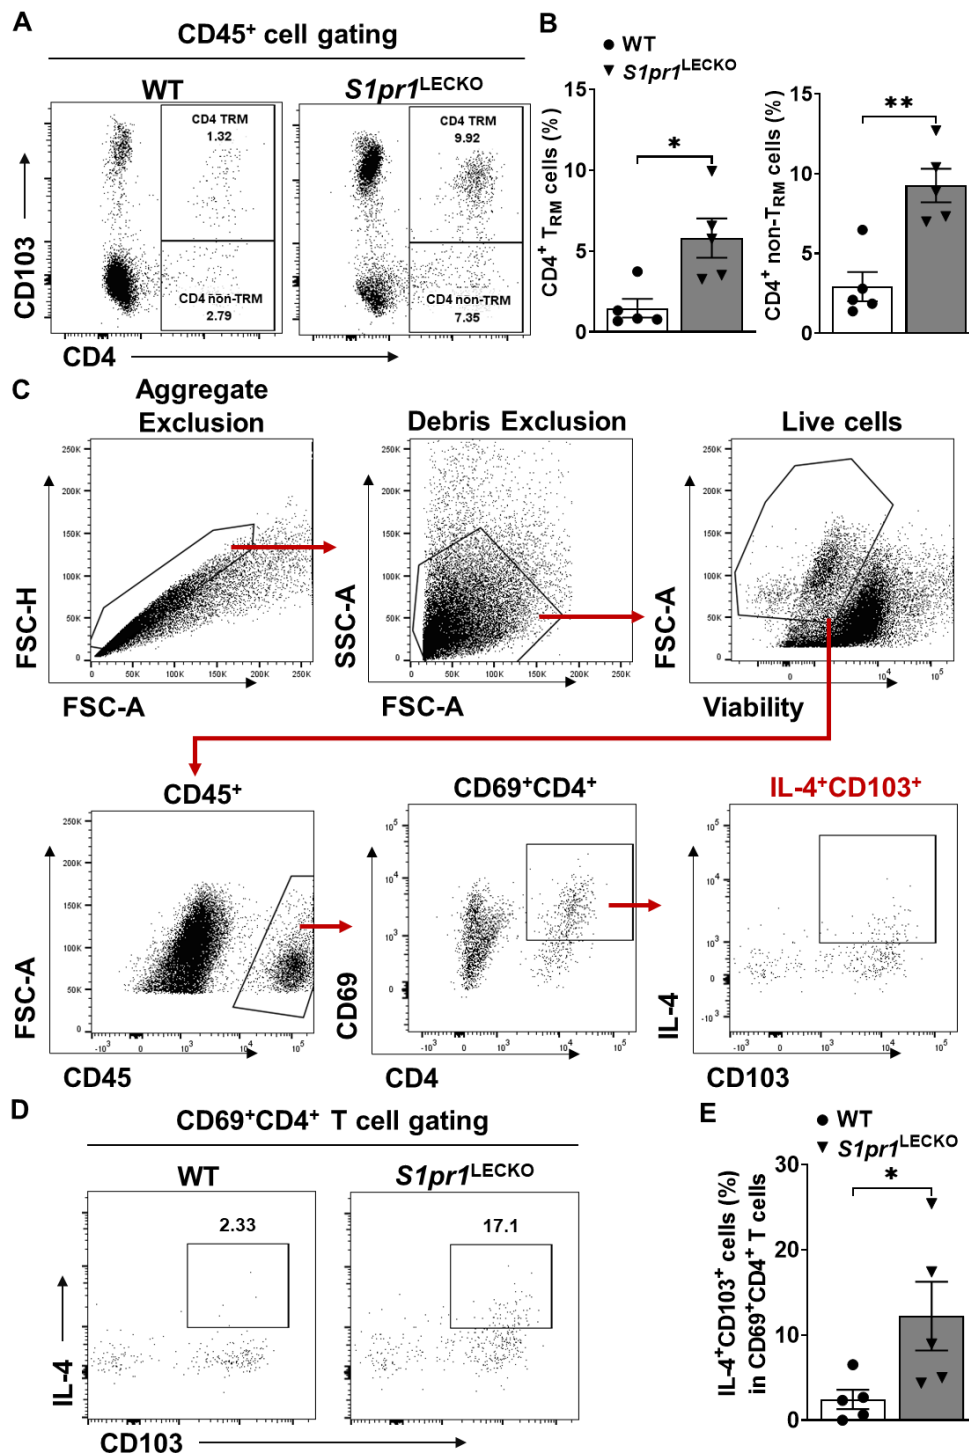

**Figure S8. IL-4<sup>+</sup> tissue-resident T memory (T<sub>RM</sub>) cells are increased in *S1pr1*<sup>LECKO</sup> lymphedema mouse groups.**

(A and B) Flow cytometric analysis was performed d21 after lymphatic surgery. Representative flow cytometric plots (A) and quantification (B) of CD103<sup>+</sup>CD4<sup>+</sup> T<sub>RM</sub> and CD103<sup>+</sup>CD4<sup>+</sup> non-T<sub>RM</sub> cells in tail tissue skin (n = 5 per each group). (C) Representative flow cytometric gating scheme for determining IL-4-producing T<sub>RM</sub> cell populations in the tail skin. (D and E) Representative flow cytometric plots (D) and quantification (E) of IL-4<sup>+</sup>CD103<sup>+</sup> in CD69<sup>+</sup>CD4<sup>+</sup> T<sub>RM</sub> cells in tail tissue skin (n = 5 per each group). Data are presented as mean ± SEM; \* p < 0.05 and \*\* p < 0.01 by the Mann-Whitney test.



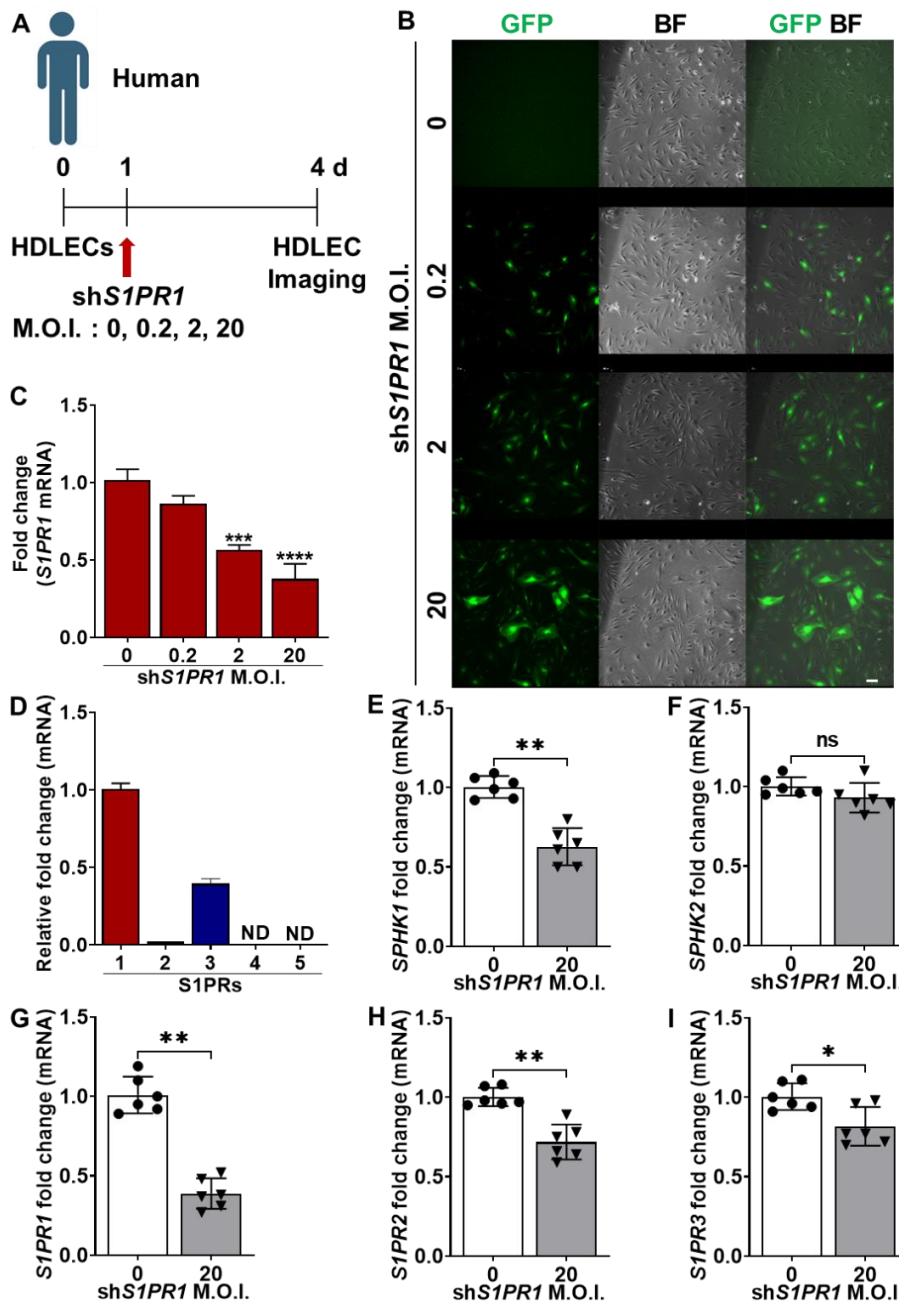

**Figure S9. sh*S1PR1* trans-infection does not affect HDLEC viability and decreases S1PRs.**

(A) Timeline of M.O.I.-dose dependent effects of sh*S1PR1* treatment on HDLECs. (B) Green fluorescent protein (GFP) tagged lentiviral sh*S1PR1*-treated HDLECs following 3 days of culture. GFP and brightfield (BF) were imaged with fluorescence microscopy. Scale bar = 100  $\mu$ m. (C) *S1PR1* mRNA level of HDLECs were analyzed by using RT-qPCR ( $n \geq 4$  per each group). (D) Relative mRNA level of S1PRs family (S1PR1,2,3,4, and 5) on HDLECs by using RT-qPCR ( $n \geq 4$  per each group). (E to I) RT-qPCR analysis of *SPHK1* (E), *SPHK2* (F), *S1PR1* (G), *S1PR2* (H), and *S1PR3* (I) mRNA levels in S1PR1 knock-down HDLECs ( $n = 6$  per each group). Data for C is presented as mean  $\pm$  SEM; \*\*\*  $p < 0.001$ , and \*\*\*\*  $p < 0.0001$  compared with the sh*Ctrl* (M.O.I. = 0) by Ordinary one-way ANOVA. Data for E, F, G, H, and I are presented as mean  $\pm$  SEM; ns (not significant), \*  $p < 0.05$ , \*\*  $p < 0.01$ , and \*\*\*\*  $p < 0.0001$  by the Mann-Whitney test. ND; not detected.



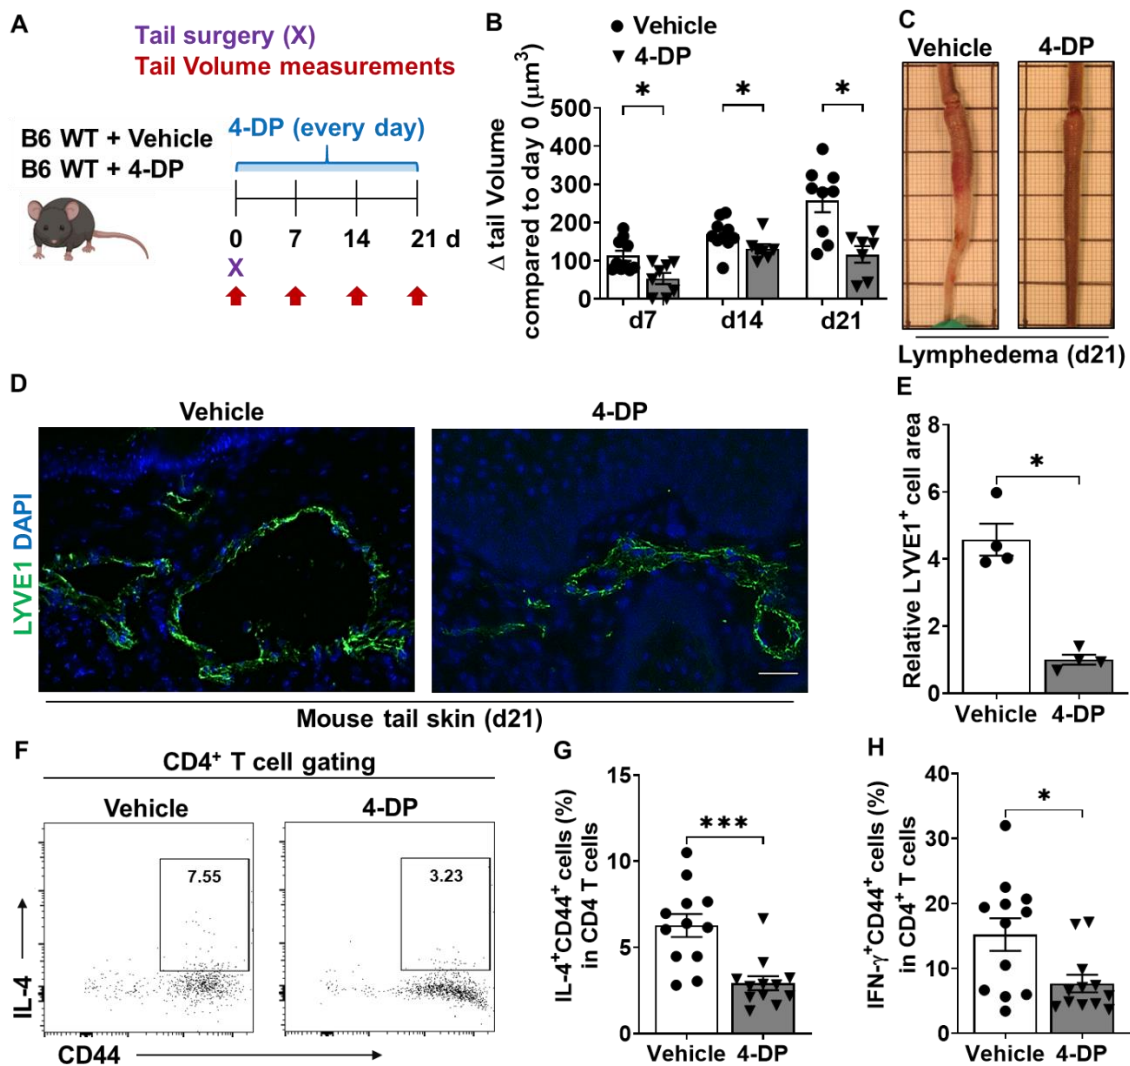

**Figure S10. Increased S1P signaling alleviates lymphedema development.**

(A) Schematic diagram of the experimental protocol. 10 mg/kg 4-DP or vehicle (PBS) was injected i.p. every day after tail surgery. (B) Quantification of tail volume changes over time of vehicle or 4-DP treated mice after lymphatic surgery ( $n \geq 7$  per each group). (C) Representative photographs of tails 21d following lymphatic surgery. (D and E) Immunofluorescent images of LYVE1 (green) of tail skin 21d after surgery. Representative image (D) and quantification of the LYVE1 areas (E) are shown ( $n = 4$  per each group). DAPI (blue) stains the nucleus. Scale bar = 50  $\mu\text{m}$ . (F and G) Flow cytometric analysis was performed d21 after lymphatic surgery. Representative flow cytometric plots (F) and quantification of IL-4<sup>+</sup>CD44<sup>+</sup> in CD4<sup>+</sup> T cells in tail tissue skin (G) ( $n = 12$  per each group). (H) quantification of IFN- $\gamma$ <sup>+</sup>CD44<sup>+</sup> in CD4<sup>+</sup> T cells in tail tissue skin ( $n = 12$  per each group). Data are presented as mean  $\pm$  SEM; \*  $p < 0.05$  and \*\*\*  $p < 0.001$  by the Mann-Whitney test.

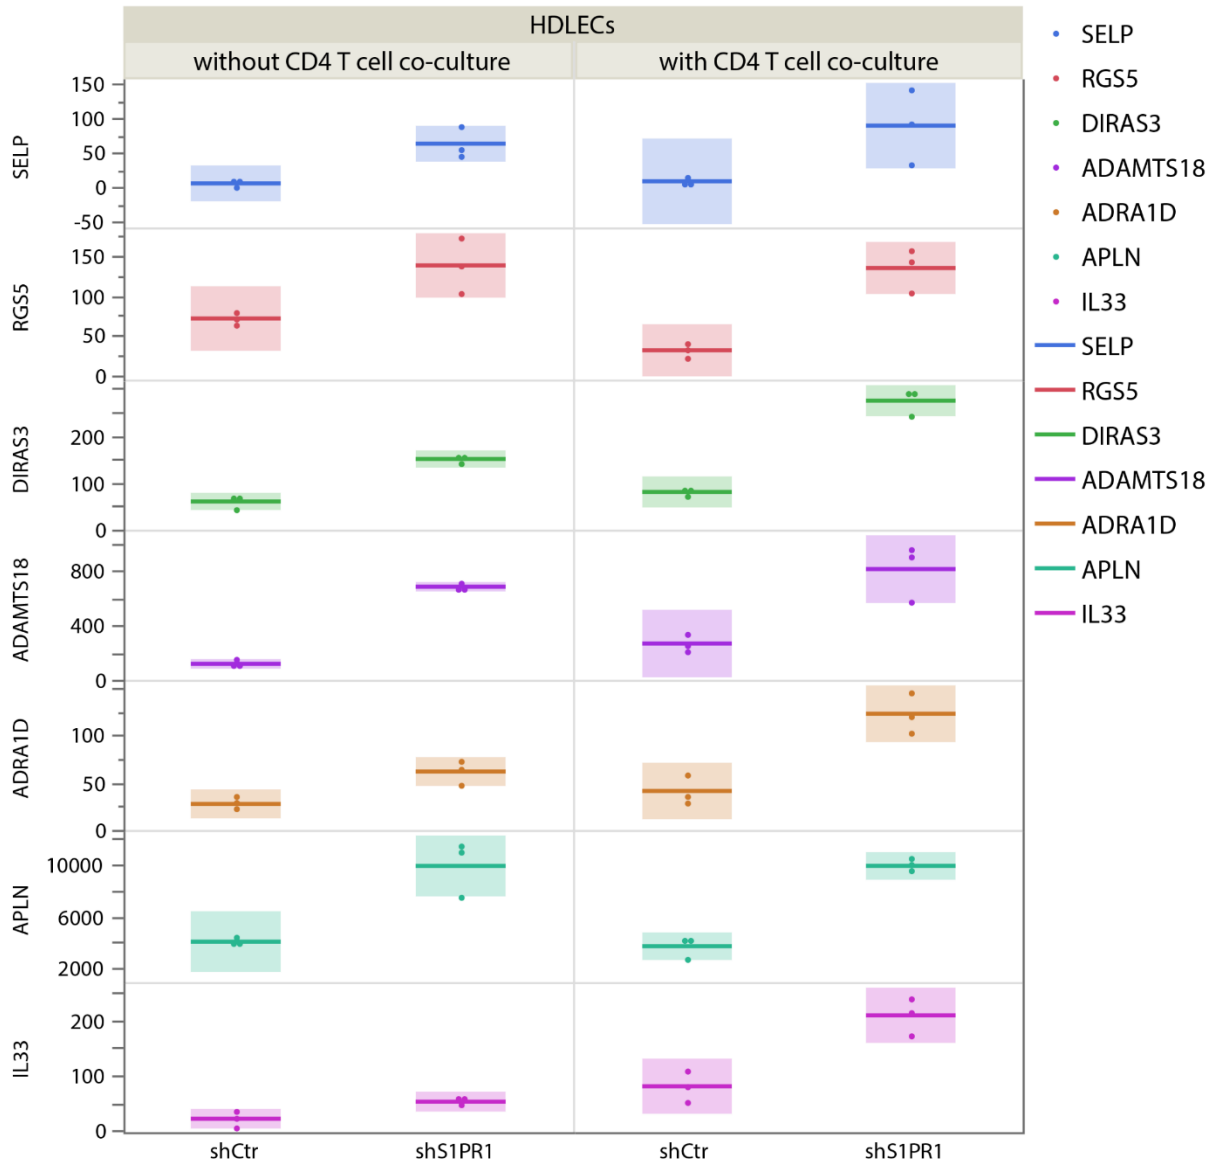

**Figure S11. Differential expression gene (DEG) results for upregulated-overlapped 7 genes in S1PR1 knock-down HDLECs with and without CD 4 T cell co-culture.** Comparison of both upregulated and overlapped genes between shS1PR1 treated-HDLEC with and without CD4 T cell co-culture for 3day in the present of  $\alpha$ -CD3/28 Abs using RNA-seq data.

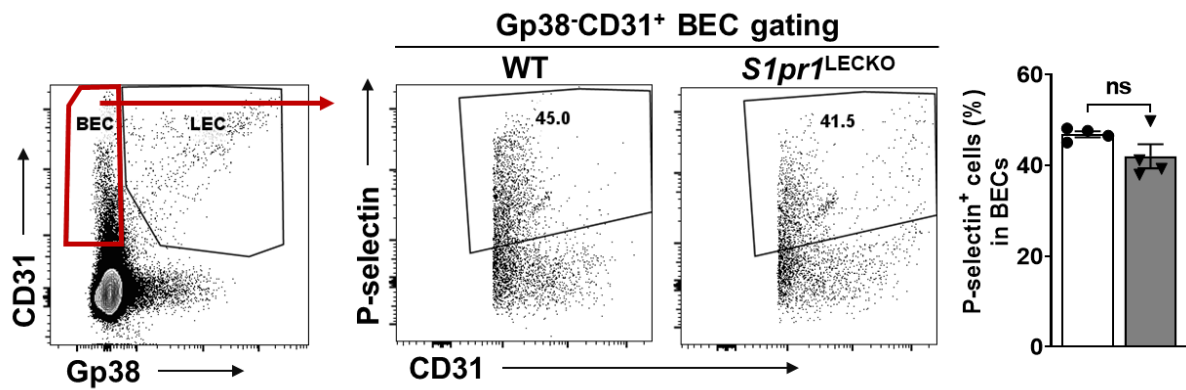

**Figure S12. P-selectin<sup>+</sup> BECs are not significantly different in lymphatic *S1pr1*-deficient mice.**

Flow cytometric analysis was performed from the tail skin of WT and *S1pr1*<sup>LECKO</sup> mice. Representative flow cytometric plots and quantification of P-selectin<sup>+</sup> BECs in tail tissue skin ( $n \geq 4$  per each group). Data are presented as mean  $\pm$  SEM; ns (not significant) compared with the WT group; by the Mann-Whitney test. BEC; Blood endothelial cell

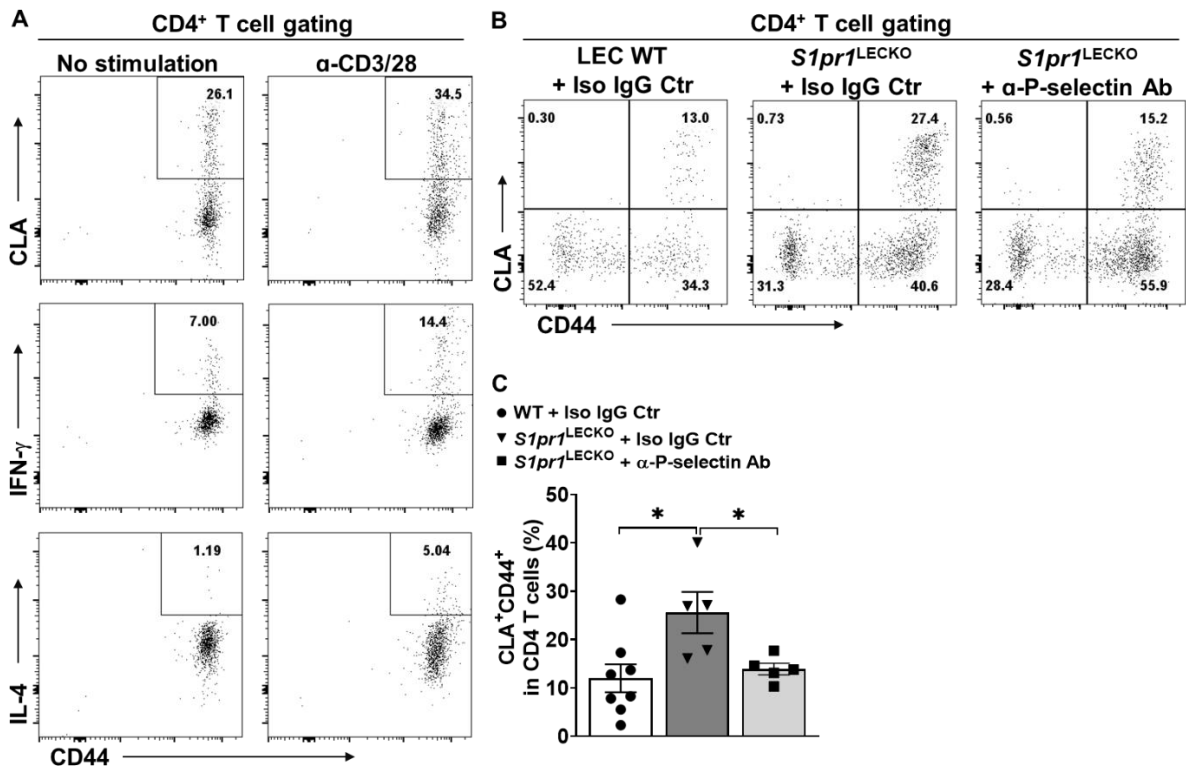

**Figure S13. Decreased CLA<sup>+</sup>CD4<sup>+</sup> T cell population in lymphedema tail skin after anti P-selectin Ab treatment.**

(A) Memory CD4 T cells were isolated from PBMC and cultured with or without  $\alpha$ -CD3/28 antibody for 3 days. Flow cytometric plots of CLA<sup>+</sup>, IFN- $\gamma$ <sup>+</sup>, and IL-4<sup>+</sup> CD44<sup>+</sup> in CD4<sup>+</sup> T cells were shown. (B and C) Representative flow cytometric plots (B) and quantification (C) of CLA<sup>+</sup>CD44<sup>+</sup> in CD4<sup>+</sup> T cells in tail skin. Data are presented as mean  $\pm$  SEM; \*  $p < 0.05$  compared with the *S1pr1*<sup>LECKO</sup> + Iso Ctr group; by the Ordinary one-way ANOVA.

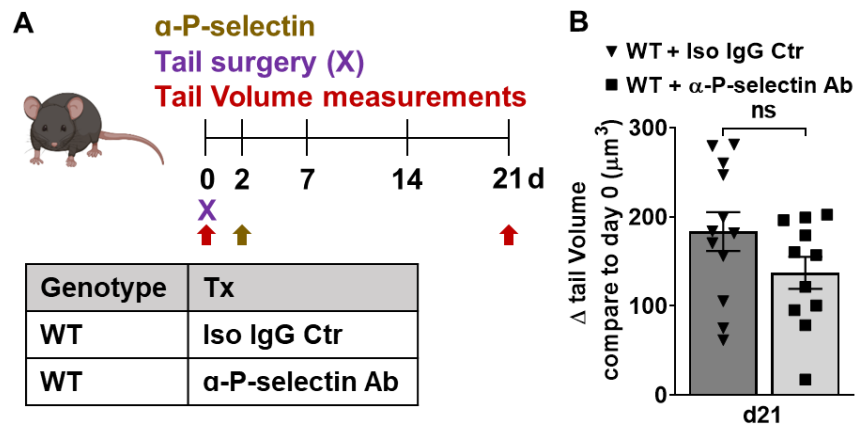

**Figure S14.  $\alpha$ -P-selectin injection 2 days after lymphedema surgery shows trend of decreased tail swelling but is not statistically significant.**

**(A)** Schematic diagram of the experimental protocol. Schematic diagram of the experimental protocol. 5 mg/kg anti-mouse P-selectin Ab (RB40.34.4) or Isotype IgG control (Iso IgG Ctr) was retro-orbital-i.v. injected into WT mice 2 days after lymphedema surgery and the tail size of animals was measured at day 21. **(B)** Quantification of tail volume changes of tail skin on day 21 after surgery ( $n \geq 11$  per each group). Data are presented as mean  $\pm$  SEM; ns (not significant) compared with the *S1pr1*<sup>LECKO</sup> + Iso Ctr group; by the Mann-Whitney test.
